# Supplementary material for: Carbon Soil Storage and Technologies to Increase Soil Carbon Stocks in the South American Savanna
Source: MDPI journal article supplement (doi:10.3390/su14095571), 2022-05-06
Supplement: s1 [file s1]

Table S1: Soil Carbon Stocks Data in Cerrado biome.

| Reference | Land use/<br>cover | Land | Carbon stocks by soil deep |        |        |        |        | Longitude<br>W | Latitude<br>S             |
|-----------|--------------------|------|----------------------------|--------|--------|--------|--------|----------------|---------------------------|
|           |                    |      | 0-20                       | 0-30   | 0-40   | 0-60   | 0-100  | 0-200          |                           |
| 26        | Tillage            |      | 33.7                       | 45.9   | 54.8   |        |        |                | 50° 35.86' W 17° 50.61' S |
| 26        | Tillage            |      | 34.5                       | 45.4   | 54.4   |        |        |                | 50° 35.86' W 17° 50.61' S |
| 26        | Tillage            |      | 34.2                       | 46.1   | 54.7   |        |        |                | 50° 35.86' W 17° 50.61' S |
| 26        | No-tillage         |      | 41.8                       | 55.5   | 65.7   |        |        |                | 50° 35.86' W 17° 50.61' S |
| 27        | No-tillage         |      | 41.6                       |        | 73.5   | 99.1   |        |                | 51° 59.00' W 16° 26.00' S |
| 27        | No-tillage         |      | 47.5                       |        | 84.3   | 116.1  |        |                | 51° 59.00' W 16° 26.00' S |
| 27        | Forestland         |      | 47.4                       |        | 84.2   | 111.7  |        |                | 51° 59.00' W 16° 26.00' S |
| 28        | Forestland         |      |                            | 51     |        | 63.4   | 82.5   |                | Supplementary 2           |
| 28        | Shrubland          |      |                            | 40.1   |        | 51.4   | 70.3   |                | Supplementary 2           |
| 28        | Rainfed crops      |      |                            | 32.8   |        | 42.6   | 57.4   |                | Supplementary 2           |
| 28        | Irrigated crops    |      |                            | 45.5   |        | 61.2   | 78.1   |                | Supplementary 2           |
| 28        | Pasture            |      |                            | 28     |        | 36.8   | 51.7   |                | Supplementary 2           |
| 29        | Forestland         |      | 109.9                      | 149.7  | 189.7  | 266.6  | 414.4  |                | 46° 42.03' W 17° 36.15' S |
| 29        | Pasture            |      | 112.2                      | 162.5  | 212.8  | 303.7  | 466.1  |                | 46° 42.03' W 17° 36.15' S |
| 29        | Planted Forest     |      | 95.6                       | 135.4  | 175    | 250    | 393.7  |                | 46° 42.03' W 17° 36.15' S |
| 29        | Agroforest         |      | 97.8                       | 140.8  | 183.8  | 263    | 407.8  |                | 46° 42.03' W 17° 36.15' S |
| 29        | Planted Forest     |      | 100.9                      | 142.1  | 183.3  | 262.4  | 414    |                | 46° 42.03' W 17° 36.15' S |
| 29        | Agroforest         |      | 98.2                       | 144.1  | 208    | 301    | 453    |                | 46° 42.03' W 17° 36.15' S |
| 30        | Pasture            |      |                            | 30.9   |        |        | 62.3   |                | 52° 37,98' W 17° 46,73' S |
| 30        | Pasture            |      |                            | 23.5   |        |        | 53     |                | 52° 37,98' W 17° 46,73' S |
| 30        | Shrubland          |      |                            | 25.7   |        |        | 54.6   |                | 52° 37,98' W 17° 46,73' S |
| 30        | Pasture            |      |                            | 27.2   |        |        | 62     |                | 50° 04.68' W 21° 25.25' S |
| 30        | Pasture            |      |                            | 26.5   |        |        | 60.5   |                | 50° 04.68' W 21° 25.25' S |
| 30        | Shrubland          |      |                            | 21.7   |        |        | 55.6   |                | 50° 04.68' W 21° 25.25' S |
| 30        | Pasture            |      |                            | 48.7   |        |        | 95.5   |                | 54° 47.20' W 22° 04.44' S |
| 30        | Pasture            |      |                            | 40     |        |        | 84.8   |                | 54° 47.20' W 22° 04.44' S |
| 30        | Shrubland          |      |                            | 43.4   |        |        | 83.5   |                | 54° 47.20' W 22° 04.44' S |
| 30        | Pasture            |      |                            | 65.9   |        |        | 164.7  |                | 45° 41.90' W 19° 48.30' S |
| 30        | Pasture            |      |                            | 61.9   |        |        | 138.1  |                | 45° 41.90' W 19° 48.30' S |
| 30        | Shrubland          |      |                            | 58.5   |        |        | 117.1  |                | 45° 41.90' W 19° 48.30' S |
| 31        | Agroforest         |      | 40.3                       |        | 54.7   | 65.3   |        |                | 44° 38.93' W 5° 15.48' S  |
| 31        | Perennial crops    |      | 28                         |        | 43     | 53.9   |        |                | 44° 38.93' W 5° 15.48' S  |
| 31        | Pasture            |      | 27.1                       |        | 39     | 49     |        |                | 44° 38.93' W 5° 15.48' S  |
| 31        | Shrubland          |      | 55.6                       |        | 81.3   | 99.9   |        |                | 44° 38.93' W 5° 15.48' S  |
| 32        | Wet Grassland      |      | 75.96                      | 113.31 | 148.83 | 211.38 |        |                | 44° 00.00' W 15° 40.00' S |
| 32        | Wet Grassland      |      | 95.92                      | 143.51 | 190.15 | 278.08 |        |                | 44° 00.00' W 15° 40.00' S |
| 33        | Shrubland          |      | 78.97                      |        | 119.85 | 154.37 | 193.43 |                | 43° 50.00' W 17° 20.00' S |
| 33        | Planted Forest     |      | 94.53                      |        | 160.25 | 216.46 | 293.2  |                | 43° 50.00' W 17° 20.00' S |
| 33        | Planted Forest     |      | 102.52                     |        | 174.85 | 239.99 | 325.31 |                | 43° 50.00' W 17° 20.00' S |
| 33        | Planted Forest     |      | 83.45                      |        | 146.96 | 203.99 | 284.11 |                | 43° 50.00' W 17° 20.00' S |
| 33        | Planted Forest     |      | 81.58                      |        | 136.72 | 186.95 | 267.18 |                | 43° 50.00' W 17° 20.00' S |
| 34        | Forestland         |      | 56.96                      |        | 91.79  | 116.74 | 159.9  | 254.31         | * *                       |
| 35        | Shrubland          |      | 59.67                      |        |        |        |        | 271.23         | 47° 59.00' W 15° 56.00' S |
| 36        | Shrubland          |      | 53                         |        |        |        | 148    | 230            | 47° 48.00' W 15° 53.00' S |
| 36        | Shrubland          |      | 46                         |        |        |        | 143    | 231            | 47° 48.00' W 15° 46.00' S |
| 36        | Grasslands         |      | 67                         |        |        |        | 209    | 297            | 47° 48.00' W 15° 47.00' S |
| 36        | Grasslands         |      | 72                         |        |        |        | 198    | 281            | 47° 48.00' W 15° 52.00' S |
| 36        | Forestland         |      | 62                         |        |        |        | 165    | 248            | 47° 48.00' W 15° 42.00' S |
| 36        | Grasslands         |      | 45                         |        |        |        | 174    | 277            | 47° 48.00' W 15° 45.00' S |
| 36        | Pasture            |      | 54                         |        |        |        | 161    | 252            | 47° 48.00' W 15° 54.00' S |
| 37        | Shrubland          |      | 39.77                      |        | 69.89  |        | 133.59 |                | 47° 59.00' W 15° 56.00' S |
| 37        | Planted Forest     |      | 44.87                      |        | 78.37  |        | 148.18 |                | 47° 59.00' W 15° 56.00' S |
| 37        | Pasture            |      | 42.18                      |        | 74.77  |        | 150.22 |                | 47° 59.00' W 15° 56.00' S |
| 37        | Tillage            |      | 36.51                      |        | 65.27  |        | 125.28 |                | 47° 59.00' W 15° 56.00' S |
| 37        | Tillage            |      | 37.34                      |        | 66.59  |        | 128.81 |                | 47° 59.00' W 15° 56.00' S |
| 37        | No-tillage         |      | 47.35                      |        | 81.14  |        | 154.97 |                | 47° 59.00' W 15° 56.00' S |
| 38        | Shrubland          |      |                            |        |        |        | 200    |                | 47° 56.11' W 15° 56.68' S |
| 39        | Planted Forest     |      |                            |        |        | 65.75  |        |                | 48° 15.73' W 18°50.00' S  |
| 39        | Shrubland          |      |                            |        |        | 74.06  |        |                | 48° 15.73' W 18°50.00' S  |
| 39        | Planted Forest     |      |                            |        |        | 59.84  |        |                | 46° 10.73'W 17°42.00' S   |
| 39        | Shrubland          |      |                            |        |        | 56.83  |        |                | 46° 10.73'W 17°42.00' S   |
| 39        | Planted Forest     |      |                            |        |        | 41.64  |        |                | 46° 10.73'W 17°42.00' S   |
| 39        | Shrubland          |      |                            |        |        | 50.43  |        |                | 46° 10.73'W 17°42.00' S   |
| 40        | Grasslands         |      | 31.1                       |        | 54.7   |        | 99.7   |                | 47° 45.00' W 15° 38.5' S  |

|    |               |         |         |        |       |       |               |              |
|----|---------------|---------|---------|--------|-------|-------|---------------|--------------|
| 40 | Pasture       | 37.3    |         | 65.5   |       | 113   | 47° 45.00' W  | 15° 38.5' S  |
| 40 | Pasture       | 30.8    |         | 55.9   |       | 97.1  | 47° 45.00' W  | 15° 38.5' S  |
| 40 | Pasture       | 32.4    |         | 58     |       | 110.3 | 47° 45.00' W  | 15° 38.5' S  |
| 40 | Pasture       | 36.1    |         | 59.9   |       | 105.5 | 47° 45.00' W  | 15° 38.5' S  |
| 40 | Pasture       | 37.3    |         | 65.8   |       | 113   | 47° 45.00' W  | 15° 38.5' S  |
| 40 | Pasture       | 39.9    |         | 67.9   |       | 113   | 47° 45.00' W  | 15° 38.5' S  |
| 41 | Wet Grassland | 123.766 | 178.227 | 208.86 | 241   |       | 47° 54.33' W  | 15° 55.63' S |
| 42 | Tillage       |         |         | 86.5   |       |       | 47° 44'.00 W  | 15° 39.50' S |
| 42 | No-tillage    |         |         | 84.5   |       |       | 47° 45.00' W  | 15° 39.50' S |
| 43 | Forestland    | 33.05   |         | 45.64  | 61.52 | 90.26 | 50° 39.65' W  | 19° 31.65' S |
| 44 | Tillage       | 16.2    |         | 30.5   |       |       | 45° 42.63' W  | 12 05.60' S  |
| 44 | Tillage       | 16.5    |         | 30.7   |       |       | 45° 42.63' W  | 12 05.61' S  |
| 44 | Tillage       | 16.1    |         | 29.6   |       |       | 45° 42.63' W  | 12 05.63' S  |
| 44 | No-tillage    | 20.7    |         | 37.5   |       |       | 45° 42.63' W  | 12 05.65' S  |
| 44 | No-tillage    | 22      |         | 38.8   |       |       | 45° 42.63' W  | 12 05.66' S  |
| 44 | No-tillage    | 22.1    |         | 40     |       |       | 45° 42.63' W  | 12 05.68' S  |
| 44 | Shrubland     | 16.2    |         | 28.9   |       |       | 45° 42.63' W  | 12 05.70' S  |
| 45 | Tillage       |         | 56.7    |        | 97.2  | 140.2 | 47° 42. 00'W  | 15° 35.50' S |
| 45 | No-tillage    |         | 60.7    |        | 101.6 | 145.8 | 47° 42. 00' W | 15° 35.50' S |
| 45 | Tillage       |         | 50.1    |        | 85.7  | 125.8 | 47° 42. 00'W  | 15° 35.50' S |
| 45 | No-tillage    |         | 55.7    |        | 92.9  | 135.8 | 47° 42. 00' W | 15° 35.50' S |
| 45 | Shrubland     |         | 70.5    |        | 117   | 164.3 | 47° 42. 00' W | 15° 35.50' S |
| 46 | Forestland    | 112.77  |         | 156.31 |       |       | 43° 17.48' W  | 15° 45.00' S |
| 46 | No-tillage    | 87.11   |         | 124.28 |       |       | 43° 17.48' W  | 15° 45.00' S |
| 46 | Tillage       | 84.86   |         | 116.33 |       |       | 43° 17.48' W  | 15° 45.00' S |
| 47 | Tillage       | 53.3    |         |        |       |       | 54° 39.00' W  | 19 25.00' S  |
| 47 | No-tillage    | 56.07   |         |        |       |       | 54° 39.00' W  | 19 25.00' S  |
| 47 | No-tillage    | 56.49   |         |        |       |       | 54° 39.00' W  | 19 25.00' S  |
| 47 | No-tillage    | 55.86   |         |        |       |       | 54° 39.00' W  | 19 25.00' S  |
| 47 | No-tillage    | 58.96   |         |        |       |       | 54° 39.00' W  | 19 25.00' S  |
| 48 | Shrubland     | 25.4    |         |        |       |       | 55° 41.58' W  | 20 25.96' S  |
| 48 | Shrubland     | 31.96   |         |        |       |       | 55°41.15'W    | 20°25.20" S  |
| 48 | Pasture       | 24.38   |         |        |       |       | 55° 41.00' W  | 20 25.96' S  |
| 48 | Pasture       | 25.01   |         |        |       |       | 55°41.15' W   | 20°25.20' S  |
| 49 | No-Tillage    |         | 85.9    |        |       | 186.3 | 47° 42.00' W  | 15° 35.50' S |
| 49 | No-Tillage    |         | 81.3    |        |       | 177.1 | 47° 42.00' W  | 15° 35.50' S |
| 49 | Tillage       |         | 71.6    |        |       | 163.4 | 47° 42.00' W  | 15° 35.50' S |
| 49 | Tillage       |         | 77.5    |        |       | 176.4 | 47° 42.00' W  | 15° 35.50' S |
| 49 | Tillage       |         | 64.8    |        |       | 163.5 | 47° 42.00' W  | 15° 35.50' S |
| 49 | Tillage       |         | 69.5    |        |       | 159   | 47° 42.00' W  | 15° 35.50' S |
| 49 | Shrubland     |         | 96.6    |        |       | 203.1 | 47° 42.00' W  | 15° 35.50' S |
| 50 | Shrubland     | 58.75   |         |        |       |       | 47° 38.00' W  | 15° 34.50' S |
| 50 | Shrubland     | 47.99   |         |        |       |       | 47° 38.00' W  | 15° 34.50' S |
| 50 | Shrubland     | 56.46   |         |        |       |       | 47° 38.00' W  | 15° 34.50' S |
| 50 | Shrubland     | 59.11   |         |        |       |       | 47° 38.00' W  | 15° 34.50' S |
| 50 | Shrubland     | 64.89   |         |        |       |       | 47° 38.00' W  | 15° 34.50' S |
| 50 | Shrubland     | 60      |         |        |       |       | 47° 38.00' W  | 15° 34.50' S |
| 50 | No-tillage    | 56      |         |        |       |       | 47° 38.00' W  | 15° 34.50' S |
| 50 | No-tillage    | 57.06   |         |        |       |       | 47° 38.00' W  | 15° 34.50' S |
| 50 | No-tillage    | 52.5    |         |        |       |       | 47° 38.00' W  | 15° 34.50' S |
| 50 | Pasture       | 45.52   |         |        |       |       | 47° 38.00' W  | 15° 34.50' S |
| 50 | Pasture       | 53.21   |         |        |       |       | 47° 38.00' W  | 15° 34.50' S |
| 50 | Pasture       | 49      |         |        |       |       | 47° 38.00' W  | 15° 34.50' S |
| 51 | Shrubland     | 35.1    |         | 62.4   |       |       | 46° 42.00' W  | 17° 33.00'S  |
| 51 | Agroforest    | 25      |         | 42     |       |       | 46° 42.00' W  | 17° 33.00'S  |
| 51 | Agroforest    | 25      |         | 41.1   |       |       | 46° 42.00' W  | 17° 33.00'S  |
| 51 | Agroforest    | 29.3    |         | 47.9   |       |       | 46° 42.00' W  | 17° 33.00'S  |
| 51 | Agroforest    | 26.6    |         | 45.4   |       |       | 46° 42.00' W  | 17° 33.00'S  |
| 51 | Pasture       | 30      |         | 52.2   |       |       | 46° 42.00' W  | 17° 33.00'S  |
| 51 | Forestland    | 34.5    |         | 60     |       |       | 46° 42.00' W  | 17° 33.00'S  |
| 52 | Shrubland     |         |         | 76.2   |       |       | *             | *            |
| 52 | Pasture       |         |         | 73.2   |       |       | *             | *            |
| 52 | Tillage       |         |         | 62.1   |       |       | *             | *            |
| 52 | No-tillage    |         |         | 59.1   |       |       | *             | *            |
| 52 | No-tillage    |         |         | 62.7   |       |       | *             | *            |
| 52 | No-tillage    |         |         | 77.4   |       |       | *             | *            |
| 52 | No-tillage    |         |         | 65.8   |       |       | *             | *            |
| 52 | No-tillage    |         |         | 74.6   |       |       | *             | *            |
| 52 | No-tillage    |         |         | 77.3   |       |       | *             | *            |
| 52 | No-tillage    |         |         | 76.3   |       |       | *             | *            |
| 53 | Shrubland     | 45.3    | 52.6    |        |       |       | 49° 18.65' W  | 16° 29' S    |
| 53 | No-tillage    | 36.5    | 47.3    |        |       |       | 49° 18.65' W  | 16° 29' S    |
| 53 | No-tillage    | 32.4    | 40.2    |        |       |       | 49° 18.65' W  | 16° 29' S    |

|    |                 |       |       |              |              |
|----|-----------------|-------|-------|--------------|--------------|
| 53 | Tillage         | 41.5  | 53.8  | 49° 18.65' W | 16° 29' S    |
| 53 | Tillage         | 47.4  | 60.4  | 49° 18.65' W | 16° 29' S    |
| 54 | Pasture         | 49.1  | 68.28 | *            | *            |
| 54 | Pasture         | 42.18 | 59.35 | *            | *            |
| 55 | Agroforest      |       | 71.16 | 55° 38.95' W | 11° 50.88' S |
| 56 | Shrubland       | 67    |       | 46° 59.55' W | 18° 56.63' S |
| 56 | Perennial crops | 61    |       | 46° 59.55' W | 18° 56.63' S |
| 57 | Shrubland       | 35.91 | 50.9  | 47° 42.00' W | 15° 35.50' S |
| 57 | Pasture         | 42.8  | 62.6  | 47° 42.00' W | 15° 35.50' S |
| 57 | Perennial crops | 39.3  | 53.9  | 47° 42.00' W | 15° 35.50' S |
| 57 | Perennial crops | 39.6  | 54.8  | 47° 42.00' W | 15° 35.50' S |
| 57 | Perennial crops | 40.18 | 56.3  | 47° 42.00' W | 15° 35.50' S |
| 57 | Perennial crops | 43.03 | 62.36 | 47° 42.00' W | 15° 35.50' S |
| 58 | Tillage         |       | 75.3  | 48° 15.73' W | 18° 50.00' S |
| 58 | Tillage         |       | 65.4  | 48° 15.73' W | 18° 50.00' S |
| 58 | Tillage         |       | 73.4  | 48° 15.73' W | 18° 50.00' S |
| 58 | Tillage         |       | 64.9  | 48° 15.73' W | 18° 50.00' S |
| 58 | Tillage         |       | 73.4  | 48° 15.73' W | 18° 50.00' S |
| 58 | Tillage         |       | 81.5  | 48° 15.73' W | 18° 50.00' S |
| 58 | No-tillage      |       | 80.5  | 48° 15.73' W | 18° 50.00' S |
| 59 | Shrubland       | 39.5  | 60.87 | 47° 42.00' W | 15° 35.50' S |
| 59 | Pasture         | 35.5  | 52.89 | 47° 42.00' W | 15° 35.50' S |
| 59 | Tillage         | 35.7  | 53.3  | 47° 42.00' W | 15° 35.50' S |
| 59 | No-tillage      | 37.8  | 56.03 | 47° 42.00' W | 15° 35.50' S |
| 60 | Shrubland       | 68.1  |       | 50° 55.67' W | 17° 47.8' S  |
| 60 | Pasture         | 54.9  |       | 50° 55.67' W | 17° 47.8' S  |
| 61 | Shrubland       | 37.89 | 61.1  | 49° 6.48' W  | 17° 43.25' S |
| 61 | Pasture         | 40.67 | 69.86 | 50° 6.48' W  | 17° 43.25' S |
| 61 | No-tillage      | 40.16 | 61.07 | 50° 6.48' W  | 17° 43.25' S |
| 61 | No-tillage      | 40.43 | 68.8  | 50° 6.48' W  | 17° 43.25' S |
| 61 | Tillage         | 34.06 | 58.7  | 50° 6.48' W  | 17° 43.25' S |
| 61 | Tillage         | 37.66 | 62.23 | 50° 6.48' W  | 17° 43.25' S |
| 62 | Shrubland       | 54    |       | 54° 39.00' W | 23° 25.00' S |
| 62 | Tillage         | 54.3  |       | 54° 39.00' W | 23° 25.00' S |
| 62 | No-tillage      | 57.3  |       | 54° 39.00' W | 23° 25.00' S |
| 62 | Shrubland       | 35.4  |       | 47° 57.00' W | 16° 15.15' S |
| 62 | Tillage         | 38.6  |       | 47° 57.00' W | 16° 15.15' S |
| 62 | No-tillage      | 41    |       | 47° 57.00' W | 16° 15.15' S |
| 63 | Grasslands      | 51.2  | 81.9  | 49° 08.00' W | 16° 32.00' S |
| 63 | Pasture         | 45.5  | 74.2  | 49° 08.00' W | 16° 32.00' S |
| 63 | Pasture         | 41.1  | 71.1  | 49° 08.00' W | 16° 32.00' S |
| 63 | Tillage         | 48.6  | 84.4  | 49° 08.00' W | 16° 32.00' S |
| 63 | No-tillage      | 49.6  | 82.5  | 49° 08.00' W | 16° 32.00' S |
| 64 | Shrubland       | 48.77 |       | 54° 43.00' W | 20° 26.00' S |
| 64 | Tillage         | 39.46 |       | 54° 43.00' W | 20° 26.00' S |
| 64 | No-tillage      | 42.17 |       | 54° 43.00' W | 20° 26.00' S |
| 64 | Shrubland       | 44.55 |       | 54° 49.00' W | 22° 14.00' S |
| 64 | Tillage         | 41.43 |       | 54° 49.00' W | 22° 14.00' S |
| 64 | No-tillage      | 41.24 |       | 54° 49.00' W | 22° 14.00' S |
| 65 | Shrubland       | 54    |       | 54° 43.00' W | 20° 26.00' S |
| 65 | Tillage         | 46.3  |       | 54° 43.00' W | 20° 26.00' S |
| 65 | No-tillage      | 47.4  |       | 54° 43.00' W | 20° 26.00' S |
| 65 | Grasslands      | 44.5  |       | 54° 49.00' W | 22° 14.00' S |
| 65 | Tillage         | 44.1  |       | 54° 50.00' W | 22° 15.00' S |
| 65 | No-tillage      | 42.6  |       | 54° 50.00' W | 22° 16.00' S |
| 65 | Grasslands      | 68.7  |       | 55° 10.00' W | 21° 37.00' S |
| 65 | No-tillage      | 56.6  |       | 55° 10.00' W | 21° 37.00' S |
| 66 | Shrubland       |       | 76    | 44° 10.00' W | 19° 26.00' S |
| 66 | No-tillage      |       | 72    | 44° 10.00' W | 19° 26.00' S |
| 66 | Tillage         |       | 73    | 44° 10.00' W | 19° 26.00' S |

\*52 sample points located in the state of Goiás; 54 located in the Parnaíba River basin.
