# Supplementary material for: Carbon Soil Storage and Technologies to Increase Soil Carbon Stocks in the South American Savanna
Source: MDPI journal article supplement (doi:10.3390/su14095571), 2022-05-06
Supplement: s1 [file s1]

Table S2: Georeferenced points of Soil Carbon Stocks  
Data from MATOPIBA.

| Reference | Land use/soil cover | Latitude | Longitude |
|-----------|---------------------|----------|-----------|
| 28        | Shrubland           | 12°09'S  | 45°22'W   |
| 28        | Shrubland           | 11°55'S  | 45°26'W   |
| 28        | Shrubland           | 11°51'S  | 45°45'W   |
| 28        | Shrubland           | 11°53'S  | 45°50'W   |
| 28        | Shrubland           | 10°25'S  | 45°33'W   |
| 28        | Shrubland           | 12°42'S  | 44°37'W   |
| 28        | Shrubland           | 13°03'S  | 46°06'W   |
| 28        | Shrubland           | 14°14'S  | 46°03'W   |
| 28        | Shrubland           | 14°02'S  | 45°48'W   |
| 28        | Shrubland           | 14°36'S  | 45°59'W   |
| 28        | Shrubland           | 14°23'S  | 45°43'W   |
| 28        | Shrubland           | 13°52'S  | 45°20'W   |
| 28        | Shrubland           | 13°40'S  | 45°18'W   |
| 28        | Shrubland           | 12°27'S  | 44°26'W   |
| 28        | Shrubland           | 13°21'S  | 45°23'W   |
| 28        | Shrubland           | 13°46'S  | 46°04'W   |
| 28        | Shrubland           | 12°05'S  | 45°02'W   |
| 28        | Shrubland           | 11°07'S  | 46°14'W   |
| 28        | Shrubland           | 12°57'S  | 45°05'W   |
| 28        | Shrubland           | 13°02'S  | 45°07'W   |
| 28        | Shrubland           | 12°05'S  | 45°00'W   |
| 28        | Forestland          | 11°46'S  | 45°46'W   |
| 28        | Forestland          | 12°23'S  | 44°56'W   |
| 28        | Forestland          | 12°25'S  | 44°56'W   |
| 28        | Forestland          | 12°54'S  | 45°29'W   |
| 28        | Forestland          | 12°26'S  | 45°24'W   |
| 28        | Forestland          | 12°15'S  | 45°02'W   |
| 28        | Forestland          | 12°39'S  | 44°35'W   |
| 28        | Forestland          | 13°05'S  | 45°59'W   |
| 28        | Forestland          | 13°25'S  | 45°31'W   |
| 28        | Forestland          | 12°23'S  | 44°51'W   |
| 28        | Forestland          | 12°29'S  | 44°22'W   |
| 28        | Forestland          | 11°54'S  | 45°53'W   |
| 28        | Forestland          | 11°45'S  | 44°10'W   |
| 28        | Forestland          | 11°40'S  | 43°59'W   |
| 28        | Forestland          | 11°57'S  | 44°10'W   |
| 28        | Forestland          | 12°04'S  | 44°57'W   |
| 28        | Forestland          | 11°59'S  | 44°55'W   |
| 28        | Forestland          | 12°01'S  | 44°57'W   |
| 28        | Forestland          | 11°56'S  | 44°33'W   |
| 28        | Forestland          | 12°06'S  | 44°56'W   |
| 28        | Irrigated crops     | 12°26'S  | 45°17'W   |
| 28        | Irrigated crops     | 12°25'S  | 45°17'W   |
| 28        | Irrigated crops     | 12°25'S  | 45°16'W   |
| 28        | Irrigated crops     | 12°53'S  | 45°30'W   |
| 28        | Irrigated crops     | 12°45'S  | 45°15'W   |
| 28        | Irrigated crops     | 12°45'S  | 45°16'W   |
| 28        | Irrigated crops     | 12°46'S  | 45°18'W   |
| 28        | Irrigated crops     | 12°47'S  | 45°17'W   |

|    |                 |         |         |
|----|-----------------|---------|---------|
| 28 | Irrigated crops | 11°46'S | 45°37'W |
| 28 | Irrigated crops | 11°46'S | 45°37'W |
| 28 | Irrigated crops | 11°40'S | 45°45'W |
| 28 | Irrigated crops | 11°41'S | 45°39'W |
| 28 | Irrigated crops | 12°09'S | 45°51'W |
| 28 | Irrigated crops | 12°09'S | 45°54'W |
| 28 | Irrigated crops | 12°13'S | 45°55'W |
| 28 | Irrigated crops | 12°14'S | 45°55'W |
| 28 | Irrigated crops | 12°14'S | 45°57'W |
| 28 | Irrigated crops | 11°47'S | 45°43'W |
| 28 | Irrigated crops | 11°45'S | 45°43'W |
| 28 | Irrigated crops | 11°46'S | 45°43'W |
| 28 | Pasture         | 12°09'S | 45°24'W |
| 28 | Pasture         | 12°07'S | 45°22'W |
| 28 | Pasture         | 11°55'S | 45°25'W |
| 28 | Pasture         | 11°55'S | 45°25'W |
| 28 | Pasture         | 12°15'S | 45°02'W |
| 28 | Pasture         | 12°15'S | 45°02'W |
| 28 | Pasture         | 13°26'S | 45°33'W |
| 28 | Pasture         | 14°14'S | 46°01'W |
| 28 | Pasture         | 12°02'S | 45°48'W |
| 28 | Pasture         | 14°29'S | 45°48'W |
| 28 | Pasture         | 14°24'S | 45°43'W |
| 28 | Pasture         | 13°52'S | 45°20'W |
| 28 | Pasture         | 12°31'S | 44°25'W |
| 28 | Pasture         | 13°28'S | 45°26'W |
| 28 | Pasture         | 11°53'S | 44°07'W |
| 28 | Pasture         | 11°49'S | 44°08'W |
| 28 | Pasture         | 11°27'S | 44°53'W |
| 28 | Pasture         | 11°28'S | 44°54'W |
| 28 | Pasture         | 12°09'S | 44°37'W |
| 28 | Pasture         | 12°09'S | 44°37'W |
| 28 | Pasture         | 12°57'S | 45°05'W |
| 28 | Rainfed crops   | 11°49'S | 45°44'W |
| 28 | Rainfed crops   | 11°58'S | 45°56'W |
| 28 | Rainfed crops   | 12°13'S | 45°56'W |
| 28 | Rainfed crops   | 12°12'S | 45°57'W |
| 28 | Rainfed crops   | 10°20'S | 45°30'W |
| 28 | Rainfed crops   | 10°25'S | 45°33'W |
| 28 | Rainfed crops   | 12°54'S | 45°30'W |
| 28 | Rainfed crops   | 12°26'S | 45°27'W |
| 28 | Rainfed crops   | 12°40'S | 44°34'W |
| 28 | Rainfed crops   | 13°06'S | 45°58'W |
| 28 | Rainfed crops   | 13°02'S | 46°06'W |
| 28 | Rainfed crops   | 13°03'S | 46°06'W |
| 28 | Rainfed crops   | 13°26'S | 45°31'W |
| 28 | Rainfed crops   | 14°14'S | 46°01'W |
| 28 | Rainfed crops   | 14°04'S | 45°49'W |
| 28 | Rainfed crops   | 14°36'S | 45°58'W |
| 28 | Rainfed crops   | 14°23'S | 45°42'W |
| 28 | Rainfed crops   | 12°27'S | 44°27'W |
| 28 | Rainfed crops   | 13°47'S | 46°06'W |
| 28 | Rainfed crops   | 11°06'S | 46°15'W |

---
